# Supplementary material for: Greenhouse gas fluxes in mangrove forest soil in an Amazon estuary
Source: Copernicus journal article supplement (doi:10.5194/bg-19-5483-2022), 2022-12-06
Supplement: Supplementary file 1 [file bg-19-5483-2022-supplement.pdf]

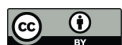

*Supplement of*

## **Greenhouse gas fluxes in mangrove forest soil in an Amazon estuary**

**Saúl Edgardo Martínez Castellón et al.**

*Correspondence to:* José Henrique Cattanio ([cattanio@ufpa.br](mailto:cattanio@ufpa.br))

The copyright of individual parts of the supplement might differ from the article licence.

Supplement S1. Monthly and seasonal (dry and rainy seasons) fluxes of CO<sub>2</sub> and CH<sub>4</sub> (g CO<sub>2</sub> or CH<sub>4</sub> m<sup>-2</sup> d<sup>-1</sup>) at the high and low topographies. Numbers represent the mean (standard error). Lower case letters compare topographies in the same month (n = 16). Upper case letters compare stations at each topography (n = 96). Different boldface letters have statistically significant variation (Kruskal Wallis, p < 0.05).

|              | CO <sub>2</sub> flux (g m <sup>-2</sup> d <sup>-1</sup> ) |                                 | CH <sub>4</sub> flux (g m <sup>-2</sup> d <sup>-1</sup> ) |                                  |
|--------------|-----------------------------------------------------------|---------------------------------|-----------------------------------------------------------|----------------------------------|
|              | High topography                                           | Low topography                  | High topography                                           | Low topography                   |
| July/2017    | <b>10.166±1.555<sup>a</sup></b>                           | <b>4.036±1.027<sup>b</sup></b>  | 0.0724±0.0518 <sup>a</sup>                                | 0.2129±0.2087 <sup>a</sup>       |
| August       | 8.513±2.672 <sup>a</sup>                                  | 12.462±3.400 <sup>a</sup>       | 0.0033±0.0016 <sup>a</sup>                                | 0.1270±0.1185 <sup>a</sup>       |
| September    | 11.506±2.515 <sup>a</sup>                                 | 6.020±1.207 <sup>a</sup>        | 0.0014±0.0008 <sup>a</sup>                                | 0.1738±0.1608 <sup>a</sup>       |
| October      | 4.147±0.653 <sup>a</sup>                                  | 3.993±0.731 <sup>a</sup>        | 0.0000±0.0000 <sup>a</sup>                                | -0.0004±0.0056 <sup>a</sup>      |
| November     | <b>7.648±1.064<sup>a</sup></b>                            | <b>0.007±0.002<sup>b</sup></b>  | <b>-0.0004±0.0001<sup>b</sup></b>                         | <b>0.1395±0.0708<sup>a</sup></b> |
| December     | 5.302±1.176 <sup>a</sup>                                  | 7.622±2.505 <sup>a</sup>        | <b>0.0009±0.0009<sup>b</sup></b>                          | <b>0.1210±0.0575<sup>a</sup></b> |
| Dry period   | 7.902±0.803 <sup>aA</sup>                                 | 6.202±0.895 <sup>aA</sup>       | <b>0.0141±0.010<sup>bB</sup></b>                          | <b>0.1280±0.053<sup>aA</sup></b> |
| January/2018 | <b>6.697±1.717<sup>a</sup></b>                            | <b>2.995±0.493<sup>b</sup></b>  | 0.0007±0.0004 <sup>a</sup>                                | 0.0294±0.0183 <sup>a</sup>       |
| February     | 9.053±2.650 <sup>a</sup>                                  | 6.384±1.428 <sup>a</sup>        | 0.0049±0.0022 <sup>a</sup>                                | 0.8743±0.7024 <sup>a</sup>       |
| March        | 5.225±1.135 <sup>a</sup>                                  | 5.970±1.534 <sup>a</sup>        | 0.0077±0.0056 <sup>a</sup>                                | 0.3736±0.2197 <sup>a</sup>       |
| April        | 14.077±4.695 <sup>a</sup>                                 | 4.785±0.711 <sup>a</sup>        | 0.1968±0.1304 <sup>a</sup>                                | 0.0372±0.2841 <sup>a</sup>       |
| May          | 3.299±0.587 <sup>a</sup>                                  | 3.565±0.472 <sup>a</sup>        | 0.0014±0.0019 <sup>a</sup>                                | 0.0218±0.5648 <sup>a</sup>       |
| June         | 8.796±2.053 <sup>a</sup>                                  | 4.704±1.183 <sup>a</sup>        | 0.0226±0.0191 <sup>a</sup>                                | 0.6739±0.6665 <sup>a</sup>       |
| Rainy period | <b>7.858±1.058<sup>aA</sup></b>                           | <b>4.734±0.440<sup>bA</sup></b> | <b>0.0390±0.023<sup>bA</sup></b>                          | <b>0.3350±0.194<sup>aA</sup></b> |
